# Supplementary material for: Immunoproteomic Analysis of Human Serological Antibody Responses to Vaccination with Whole-Cell Pertussis Vaccine (WCV)
Source: PubMed Central journal article supplement (PMC2976700; doi:10.1371/journal.pone.0013915), 2010-11-09
Supplement: pone.0013915.s002.pdf [file pone.0013915.s002.pdf]

**Table S1: The human immunoreactive proteins identified in TMPs and ECPs of *B.pertussis* Chinese WCV strain 58003 by PMF**

| Spot ID   | GI       | Locus  | Location      | Protein Product                                 | COG | Theoretical MW/pI | Experimental MW/pI | Mascot Score | Matched peptides | Sequence coverage |
|-----------|----------|--------|---------------|-------------------------------------------------|-----|-------------------|--------------------|--------------|------------------|-------------------|
| MP1       | 33592122 | BP0966 | OM-associated | sulfate-binding protein precursor (Sbp)         | P   | 37913/7.83        | 50391/5.05         | 169          | 12               | 38%               |
| MP2,12,16 | 33594369 | BP3494 | OuterMembrane | serum resistance protein (BrkA)                 | MU  | 103377/6.62       | 100156/6.50        | 172          | 16               | 22%               |
| MP3       | 33594289 | BP3405 | OuterMembrane | outer membrane porin protein OmpQ               | M   | 39141/5.59        | 40017/4.96         | 198          | 13               | 41%               |
| MP4       | 33592006 | BP0840 | OuterMembrane | outer membrane porin protein precursor (OmpP)   | M   | 41045/5.51        | 60211/4.07         | 209          | 14               | 51%               |
| MP5       | 33591607 | BP0379 | Cytoplasm     | putative L-lactate dehydrogenase (Ldh)          | C   | 37214/5.59        | 50382/6.00         | 116          | 10               | 30%               |
| MP6       | 33592912 | BP1857 | Cytoplasm     | glutamate dehydrogenase (GdhA)                  | E   | 46323/5.97        | 40124/6.55         | 132          | 13               | 33%               |
| MP7       | 33593353 | BP2361 | Cytoplasm     | succinate dehydrogenase (SdhA)                  | C   | 64855/6.07        | 85202/6.49         | 101          | 11               | 20%               |
| MP8       | 33592010 | BP0844 | Cytoplasm     | NADH dehydrogenase delta subunit (NuoD)         | C   | 47458/5.75        | 70241/5.97         | 157          | 15               | 34%               |
| MP9       | 33592195 | BP1054 | Extracellular | pertactin precursor (Prn)                       | MU  | 93452/9.23        | 95763/6.52         | 102          | 12               | 26%               |
| MP10,21   | 33594370 | BP3495 | Cytoplasm     | chaperonin GroEL (GroEL)                        | O   | 57481/5.13        | 65346/5.48         | 192          | 16               | 26%               |
| MP11      | 33593707 | BP2747 | OM-associated | putative ABC transport solute-binding protein   | E   | 40652/6.17        | 55217/6.04         | 128          | 11               | 24%               |
| MP13      | 33593471 | BP2488 | Cytoplasm     | isocitrate dehydrogenase (Icd)                  | C   | 45793/5.71        | 70165/5.50         | 163          | 12               | 28%               |
| MP15      | 33593298 | BP2304 | Cytoplasm     | putative 2-hydroxyacid dehydrogenase            | HE  | 33902/5.73        | 38683/5.96         | 179          | 12               | 56%               |
| MP17      | 33594134 | BP3228 | Cytoplasm     | putative septum site-determining protein (MinD) | D   | 29681/5.20        | 35873/4.69         | 88           | 7                | 23%               |
| MP18      | 33594616 | BP3757 | Periplasm     | putative ABC transporter, ATP-binding protein   | Q   | 29624/5.26        | 35259/4.82         | 115          | 10               | 32%               |

|             |          |        |               |                                                       |    |             |             |     |    |     |
|-------------|----------|--------|---------------|-------------------------------------------------------|----|-------------|-------------|-----|----|-----|
| <b>MP20</b> | 33593524 | BP2541 | Cytoplasm     | succinyl-CoA synthetase subunit beta (SucC)           | C  | 40939/5.23  | 60228/4.57  | 151 | 13 | 25% |
| <b>MP24</b> | 33593808 | BP2864 | Cytoplasm     | putative alcohol dehydrogenase                        | CR | 36683/5.94  | 59895/6.03  | 83  | 7  | 27% |
| <b>MP25</b> | 33592150 | BP1000 | Cytoplasm     | glyceraldehyde-3-phosphate dehydrogenase (GAPDH)      | G  | 36284/6.37  | 49769/7.00  | 66  | 6  | 24% |
| <b>MP26</b> | 33591361 | BP0102 | Periplasm     | putative penicillin-binding protein precursor (PBP)   | M  | 44879/7.80  | 70326/7.08  | 206 | 14 | 29% |
| <b>MP27</b> | 33593772 | BP2818 | OM-associated | hypothetical protein BP2818                           | P  | 28742/7.82  | 35292/6.20  | 147 | 11 | 48% |
| <b>MP28</b> | 33594649 | BP3794 | Unknown       | putative bacterial secretion system protein (PtlF)    | U  | 29471/6.30  | 34953/6.44  | 96  | 7  | 35% |
| <b>MP29</b> | 33591491 | BP0250 | OM-associated | hypothetical protein BP0250                           | S  | 34534/7.66  | 35213/6.81  | 111 | 8  | 35% |
| <b>MP30</b> | 33591370 | BP0112 | Cytoplasm     | cystathionine beta-lyase (MetC)                       | E  | 43323/5.90  | 49306/6.33  | 107 | 9  | 31% |
| <b>SP1</b>  | 33594369 | BP3494 | OuterMembrane | serum resistance protein (BrkA)                       | MU | 103377/6.62 | 80149/5.06  | 255 | 23 | 25% |
| <b>SP2</b>  | 33592195 | BP1054 | Extracellular | pertactin precursor (Prn)                             | MU | 93452/9.23  | 93016/5.51  | 217 | 19 | 35% |
| <b>SP3</b>  | 33594444 | BP3575 | Periplasm     | hypothetical protein BP3575                           | E  | 43185/5.92  | 45168/5.04  | 109 | 12 | 29% |
| <b>SP4</b>  | 33591281 | BP0007 | Cytoplasm     | elongation factor Tu (EF-Tu)                          | -  | 42916/5.34  | 60057/5.00  | 138 | 12 | 34% |
| <b>SP5</b>  | 33592409 | BP1285 | OM-associated | leu/ile/val-binding protein precursor (LivJ)          | -  | 39608/6.33  | 55326/5.21  | 96  | 9  | 35% |
| <b>SP6</b>  | 33592006 | BP0840 | OuterMembrane | outer membrane porin protein precursor (OmpP)         | M  | 41045/5.51  | 49020/4.95  | 155 | 12 | 35% |
| <b>SP7</b>  | 33592122 | BP0966 | OM-associated | sulfate-binding protein precursor (Sbp)               | P  | 37913/7.83  | 40221/6.52  | 203 | 15 | 60% |
| <b>SP8</b>  | 33592249 | BP1112 | OuterMembrane | putative outer membrane ligand binding protein (BipA) | -  | 137194/6.26 | 107433/4.87 | 309 | 28 | 37% |
| <b>SP9</b>  | 33591762 | BP0558 | OM-associated | amino acid-binding periplasmic protein                | ET | 36140/6.64  | 41680/6.24  | 157 | 13 | 36% |
| <b>SP10</b> | 33592518 | BP1420 | Cytoplasm     | elongation factor Ts (EF-Ts)                          | J  | 30904/5.31  | 43279/5.33  | 255 | 18 | 60% |
| <b>SP11</b> | 33593898 | BP2963 | OM-associated | putative exported solute binding protein              | Q  | 40317/8.26  | 39891/5.02  | 162 | 14 | 32% |
