# Supplementary material for: Immunoproteomic Analysis of Human Serological Antibody Responses to Vaccination with Whole-Cell Pertussis Vaccine (WCV)
Source: PubMed Central journal article supplement (PMC2976700; doi:10.1371/journal.pone.0013915), 2010-11-09
Supplement: pone.0013915.s003.pdf [file pone.0013915.s003.pdf]

**Table S1: The human immunoreactive proteins identified in TMPs and ECPs of *B.pertussis* Chinese WCV strain 58003 by PMF**

| Spot ID   | GI       | Locus  | Location      | Protein Product                                     | COG | Theoretical MW/pI | Experimental MW/pI | Mascot Score | Matched peptides | Sequence coverage |
|-----------|----------|--------|---------------|-----------------------------------------------------|-----|-------------------|--------------------|--------------|------------------|-------------------|
| MP1       | 33592122 | BP0966 | OM-associated | sulfate-binding protein precursor (Sbp)             | P   | 37913/7.83        | 37891/5.01         | 169          | 12               | 38%               |
| MP2,12,16 | 33594369 | BP3494 | Outermembrane | serum resistance protein (BrkA)                     | MU  | 103377/6.62       | 103315/6.15        | 172          | 16               | 22%               |
| MP3       | 33594289 | BP3405 | Outermembrane | outer membrane porin protein OmpQ (OmpQ)            | M   | 39141/5.59        | 39117/5.17         | 198          | 13               | 41%               |
| MP4       | 33592006 | BP0840 | Outermembrane | outer membrane porin protein precursor (OmpP)       | M   | 41045/5.51        | 41020/4.07         | 209          | 14               | 51%               |
| MP5       | 33591607 | BP0379 | Cytoplasm     | putative L-lactate dehydrogenase (Ldh)              | C   | 37214/5.59        | 37272/6.21         | 116          | 10               | 30%               |
| MP6       | 33592912 | BP1857 | Cytoplasm     | glutamate dehydrogenase (GdhA)                      | E   | 46323/5.97        | 46295/6.55         | 132          | 13               | 33%               |
| MP7       | 33593353 | BP2361 | Cytoplasm     | succinate dehydrogenase (SdhA)                      | C   | 64855/6.07        | 64815/6.39         | 101          | 11               | 20%               |
| MP8       | 33592010 | BP0844 | Cytoplasm     | NADH dehydrogenase delta subunit (NuoD)             | C   | 47458/5.75        | 47398/6.00         | 157          | 15               | 34%               |
| MP9       | 33592195 | BP1054 | Extracellular | pertactin precursor (Prn)                           | MU  | 93452/9.23        | 93396/6.69         | 102          | 12               | 26%               |
| MP10,21   | 33594370 | BP3495 | Cytoplasm     | chaperonin GroEL (GroEL)                            | O   | 57481/5.13        | 57446/4.55         | 192          | 16               | 26%               |
| MP11      | 33593707 | BP2747 | OM-associated | putative ABC transport solute-binding protein       | E   | 40652/6.17        | 40699/6.14         | 128          | 11               | 24%               |
| MP13      | 33593471 | BP2488 | Cytoplasm     | isocitrate dehydrogenase (Icd)                      | C   | 45793/5.71        | 45765/5.66         | 135          | 10               | 28%               |
| MP15      | 33593298 | BP2304 | Cytoplasm     | putative 2-hydroxyacid dehydrogenase                | HE  | 33902/5.73        | 33882/5.09         | 179          | 12               | 56%               |
| MP17      | 33594134 | BP3228 | Cytoplasm     | putative septum site-determining protein (MinD)     | D   | 29681/5.20        | 29663/4.99         | 88           | 7                | 23%               |
| MP18      | 33594616 | BP3757 | Periplasm     | putative ABC transporter, ATP-binding protein       | Q   | 29624/5.26        | 29606/4.89         | 115          | 10               | 32%               |
| MP20      | 33593524 | BP2541 | Cytoplasm     | succinyl-CoA synthetase subunit beta (SucC)         | C   | 40939/5.23        | 40913/4.65         | 151          | 13               | 25%               |
| MP24      | 33593808 | BP2864 | Cytoplasm     | putative alcohol dehydrogenase                      | CR  | 36683/5.94        | 36660/6.13         | 83           | 7                | 27%               |
| MP25      | 33592150 | BP1000 | Cytoplasm     | glyceraldehyde-3-phosphate dehydrogenase (GAPDH)    | G   | 36284/6.37        | 36262/7.00         | 66           | 6                | 24%               |
| MP26      | 33591361 | BP0102 | Periplasm     | putative penicillin-binding protein precursor (PBP) | M   | 44879/7.80        | 44851/7.08         | 218          | 14               | 29%               |
| MP27      | 33593772 | BP2818 | OM-associated | hypothetical protein BP2818                         | P   | 28742/7.82        | 28725/6.20         | 147          | 11               | 48%               |
| MP28      | 33594649 | BP3794 | Unknown       | putative bacterial secretion system protein (PtlF)  | U   | 29471/6.30        | 29453/6.44         | 90           | 7                | 35%               |

|      |          |        |               |                                                       |    |             |             |     |    |     |
|------|----------|--------|---------------|-------------------------------------------------------|----|-------------|-------------|-----|----|-----|
| MP29 | 33591491 | BP0250 | OM-associated | hypothetical protein BP0250                           | S  | 34534/7.66  | 34513/7.04  | 90  | 7  | 35% |
| MP30 | 33591370 | BP0112 | Cytoplasm     | cystathionine beta-lyase (MetC)                       | E  | 43323/5.90  | 43296/5.31  | 107 | 9  | 31% |
| SP1  | 33594369 | BP3494 | Outermembrane | serum resistance protein (BrkA)                       | MU | 103377/6.62 | 103315/5.89 | 255 | 23 | 25% |
| SP2  | 33592195 | BP1054 | Extracellular | pertactin precursor (Prn)                             | MU | 93452/9.23  | 93396/6.50  | 217 | 19 | 35% |
| SP3  | 33594444 | BP3575 | Periplasm     | hypothetical protein BP3575                           | E  | 43185/5.92  | 43159/5.60  | 109 | 12 | 29% |
| SP4  | 33591281 | BP0007 | Cytoplasm     | elongation factor Tu (EF-Tu)                          | -  | 42916/5.34  | 42889/5.23  | 138 | 12 | 34% |
| SP5  | 33592409 | BP1285 | OM-associated | leu/ile/val-binding protein precursor (LivJ)          | -  | 39608/6.33  | 39583/6.37  | 96  | 9  | 35% |
| SP6  | 33592006 | BP0840 | Outermembrane | outer membrane porin protein precursor (OmpP)         | M  | 41045/5.51  | 41020/5.14  | 155 | 12 | 35% |
| SP7  | 33592122 | BP0966 | OM-associated | sulfate-binding protein precursor (Sbp)               | P  | 37913/7.83  | 37891/6.55  | 203 | 15 | 60% |
| SP8  | 33592249 | BP1112 | Outermembrane | putative outer membrane ligand binding protein (BipA) | -  | 137194/6.26 | 137111/5.91 | 309 | 28 | 37% |
| SP9  | 33591762 | BP0558 | OM-associated | amino acid-binding periplasmic protein                | ET | 36140/6.64  | 36118/6.27  | 157 | 13 | 36% |
| SP10 | 33592518 | BP1420 | Cytoplasm     | elongation factor Ts (EF-Ts)                          | J  | 30904/5.31  | 30885/5.11  | 255 | 18 | 60% |
| SP11 | 33593898 | BP2963 | OM-associated | putative exported solute binding protein              | Q  | 40317/8.26  | 40291/6.76  | 162 | 14 | 32% |
